# Supplementary material for: Detection of Rocio Virus SPH 34675 during Dengue Epidemics, Brazil, 2011–2013
Source: PubMed Central journal article supplement (PMC7101124; doi:10.3201/2604.190487), 2020-04
Supplement: 19-0487-Techapp-s1.pdf [file 19-0487-Techapp-s1.pdf]

# Detection of Rocio Virus SPH 34675 during Dengue Epidemics, Brazil, 2011–2013

## Appendix

**Appendix Table 1.** Clinical data of the acute febrile patients positive for Rocio virus infection in Goiânia county, Central Brazil

| Sign or symptom      | Study patients     |                  |
|----------------------|--------------------|------------------|
|                      | ROCV (p18), female | ROCV (p21), male |
| Myalgia              | Yes                | Yes              |
| Arthralgia           | Yes                | Yes              |
| Prostration          | Yes                | No               |
| Abdominal pain       | Yes                | No               |
| Diarrhea             | Yes                | No               |
| Headache             | No                 | Yes              |
| Eye pain             | No                 | Yes              |
| Itching              | No                 | Yes              |
| Nausea               | No                 | Yes              |
| Vomiting             | No                 | No               |
| Dizziness            | No                 | No               |
| Epistaxis            | No                 | No               |
| Ascites              | No                 | No               |
| Palpebral edema      | No                 | No               |
| Neurological         | No                 | No               |
| Exanthema            | No                 | No               |
| Shaking              | No                 | No               |
| Lethargy             | No                 | No               |
| Paresthesia          | No                 | No               |
| Paresis              | No                 | No               |
| Jaundice             | No                 | No               |
| Cyanosis             | No                 | No               |
| Hepatomegaly         | No                 | No               |
| Splenomegaly         | No                 | No               |
| Cholecystitis        | No                 | No               |
| Respiratory distress | No                 | No               |

**Appendix Table 2.** Results of laboratory tests of acute febrile patients positive for Rocio virus in Goiânia county, Central Brazil\*

| Laboratory tests                                | Study patients |         |         |            |         |         |
|-------------------------------------------------|----------------|---------|---------|------------|---------|---------|
|                                                 | ROCV (p18)     |         |         | ROCV (p21) |         |         |
|                                                 | T1             | T2      | T3      | T1         | T2      | T3      |
| Hematocrit (%)                                  | 32.7           | 36.7    | 34.9    | 47.4       | 46.1    | 45.8    |
| Hemoglobin (g/dL)                               | 10.8           | 11.9    | 11.4    | 15.5       | 15.4    | 16.6    |
| Leukocyte (cells/mm <sup>3</sup> )              | 6,900          | 4,900   | 4,500   | 3,560      | 3,400   | 3,730   |
| Platelets (cells/mm <sup>3</sup> )              | 120,000        | 220,000 | 147,000 | 207,000    | 201,000 | 198,000 |
| AST (mg/dL)                                     | 17             | 19      | 19      | 35         | 42      | 29      |
| ALT (mg/dL)                                     | 12             | 78      | 15      | 31         | 51      | 28      |
| Albumin (mg/dL)                                 | 3.4            | 3.6     | 3.6     | 4.3        | 3.83    | 4.2     |
| Creatinine (mg/dL)                              | 1.1            | 1.06    | 1.05    | 1.08       | 1.12    | 1.19    |
| Direct bilirubin (mg/dL)                        | 0.18           | 0.27    | 0.16    | 0.16       | 0.29    | 0.26    |
| Indirect bilirubin (mg/dL)                      | 0.22           | 0.23    | 0.24    | 0.51       | 0.6     | 0.62    |
| Activated partial thromboplastin time (seconds) | 79.2           | 76.6    | 49.9    | 72.6       | 48.2    | 100     |
| International normalized ratio (%)              | 1.1            | 1.12    | 1.38    | 1.19       | 1.57    | 0.53    |

\*T1, sample collected until the seventh day of postdisease onset (PDO); T2, sample collected between the eighth and 15th day PDO; T3, sample collected between the 20th and 30th day PDO.

**Appendix Table 3.** Patient data and background information for the two samples positive for Rocio virus in Goiânia county, Central Brazil

| Patient data/background                                    | Study patients     |                    |
|------------------------------------------------------------|--------------------|--------------------|
|                                                            | ROCV (p18)         | ROCV (p21)         |
| Type of patient                                            | Ambulatory patient | Ambulatory patient |
| Year of blood sample collection?                           | 2012               | 2013               |
| Has the patient ever had yellow fever?                     | No                 | No                 |
| Has the patient ever been vaccinated against yellow fever? | Yes                | Yes                |
| Has the patients ever had dengue?                          | -                  | Yes (2008)         |
| Diabetes mellitus?                                         | No                 | No                 |
| Chronic renal failure?                                     | No                 | No                 |
| Asthma?                                                    | No                 | No                 |
| Lupus                                                      | No                 | No                 |
| Cancer?                                                    | No                 | No                 |
| AIDS?                                                      | No                 | No                 |
| Has the patient had hepatitis B or C?                      | No                 | No                 |
| Has the patient ever had a transplant?                     | No                 | No                 |
| Does the patient use any medication regularly?             | -                  | No                 |

**Appendix Table 4.** Results of laboratory tests for DENV in Goiânia county, Central Brazil\*

| Laboratory tests | Study patients |                 |                        |            |                |         |   |
|------------------|----------------|-----------------|------------------------|------------|----------------|---------|---|
|                  | ROCV (p18)     |                 |                        | ROCV (p21) |                |         |   |
|                  | T1*            | T2†             | T3‡                    | T1         | T2             | T3      |   |
| ELISA            | IgM anti-DENV  | NR <sup>d</sup> | NR                     | NR         | U <sup>e</sup> | U       | - |
|                  |                |                 | OD <sup>f</sup> = 0.26 |            |                | OD= 0.3 |   |
|                  | IgG anti-DENV  | NR              | NR                     | NR         | R <sup>g</sup> | -       | - |
|                  |                |                 | OD= 0.15               |            |                | OD= 2.1 |   |
| NS1 DENV         |                | NR              | -                      | -          | NR             | -       | - |
| RT-PCR           |                | Negative        | -                      | -          | Negative       | -       | - |

\*OD, optical density; NR, not reactive; R, reactive; T1, Sample collected until the seventh day after disease onset (ADO); T2, sample collected between the eighth and 15th day ADO; T3, sample collected between the 20th and 30th ADO; U, undetermined.

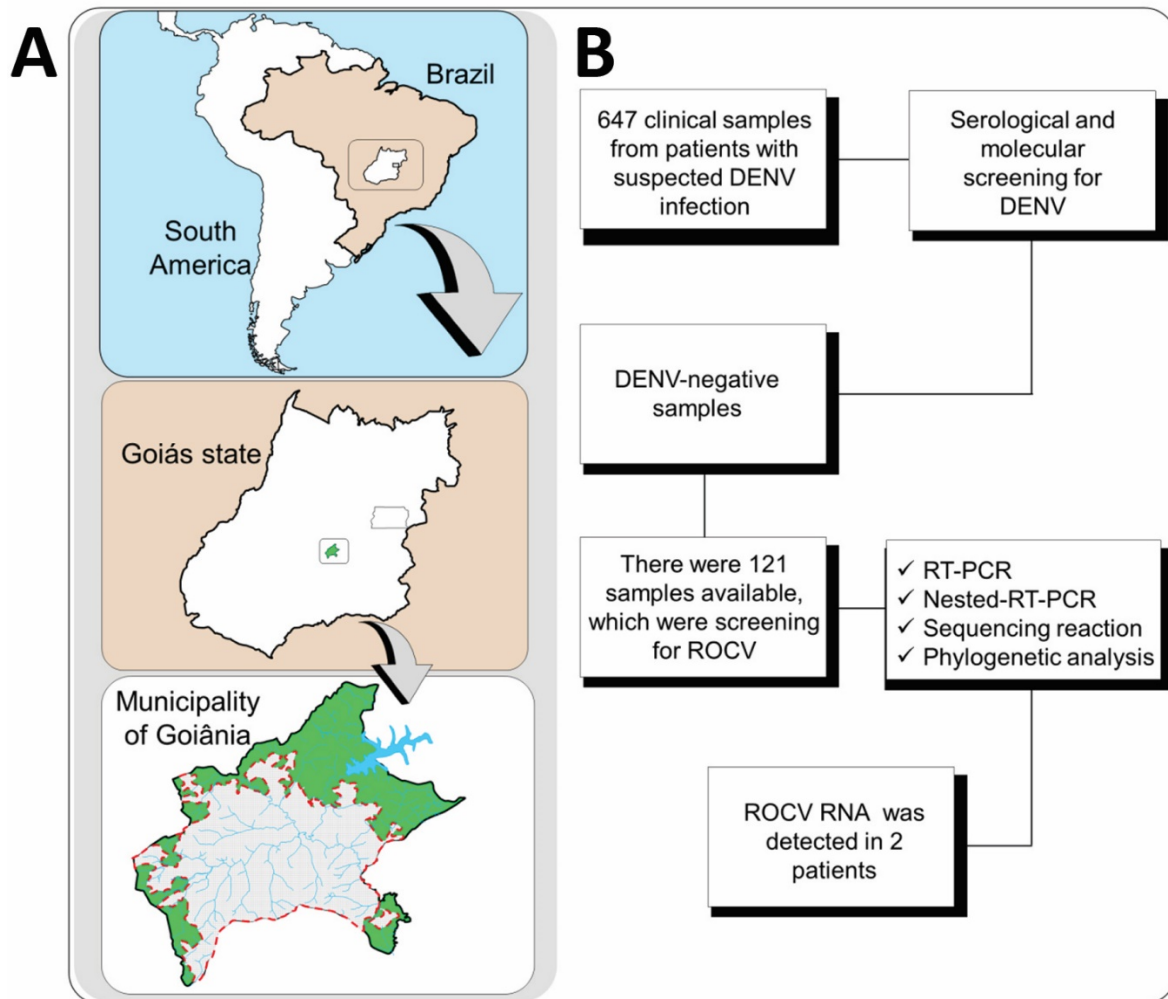

**Appendix Figure.** Map of the study site and methodology flowchart. Panel A shows a map of Goiás state (Brazil) with the location of the municipality of Goiânia. Panel B shows the methodology flowchart.
